# Supplementary material
Source: PubMed Central journal article supplement (PMC3425207)
Supplement: supp_pp.112.200162_200162suppdata.pdf [file supp_pp.112.200162_200162suppdata.pdf]

## Supplemental figure S1

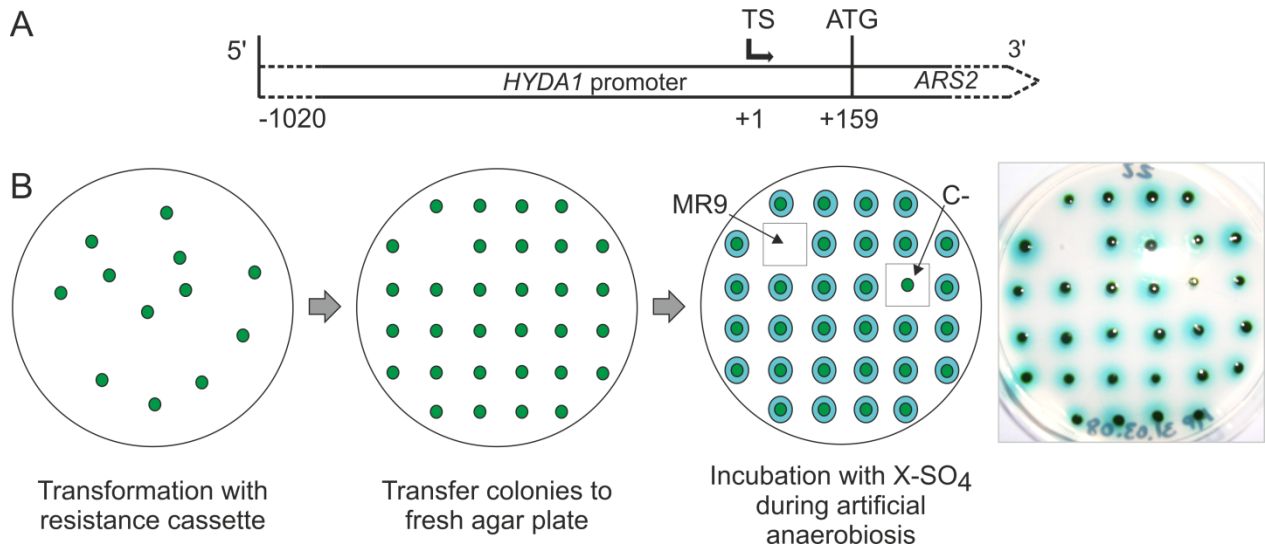

**Supplemental figure S1.** Scheme of the setup applied for identifying *C. reinhardtii* transformants with impaired *HYDA1* promoter activity. A, Chimeric construct consisting of the *HYDA1* promoter from position -1020 to +158 relative to the transcription start site as indicated in Stirnberg and Happe, 2004, and *ARS2* reporter gene (*pHYDA1:ARS2*) present in strain MR9, which was transformed with a paromomycin resistance cassette. B, After insertional mutagenesis of *C. reinhardtii* strain MR9, its paromomycin resistant progenies were grown on TAP-agar plates. These were transferred to an anaerobic tent and the artificial arylsulfatase (ARS) substrate X-SO<sub>4</sub> was dropped on each colony. After 24 h, the presence or absence of a blue staining served as an indicator for an active or inactive *HYDA1* promoter, respectively. A paromomycin resistant derivative of wild type strain CC-124 served as control for the absence of endogenous ARS activity (C-), while strain MR9 was used to ensure the paromomycin selection pressure. (TS: transcription start site, ATG: translation start site)

## Supplemental figure S2

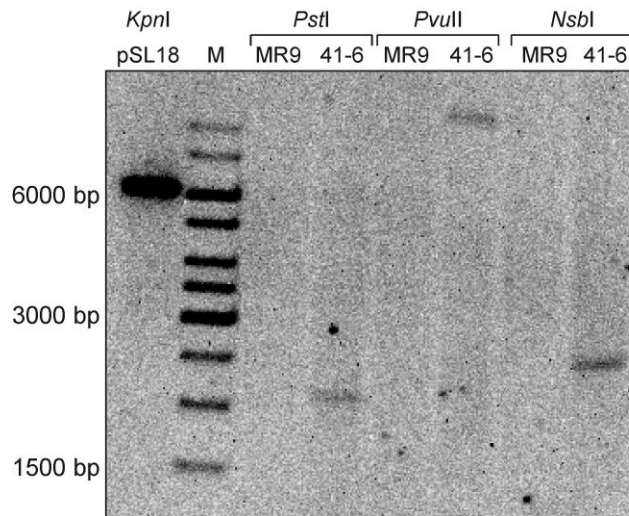

**Supplemental figure S2.** Southern blot analysis determining the integration frequency of the paromomycin resistance cassette in *C. reinhardtii* strain 41-6. Genomic DNA from parental strain MR9 and transformant 41-6 was digested using the indicated restriction enzymes and separated by agarose gel electrophoresis. A digoxigenin labeled *APHVIII*-specific probe was used to detect the paromomycin resistance cassette. *KpnI* digested plasmid pSL18 served as a control.

### Supplemental figure S3

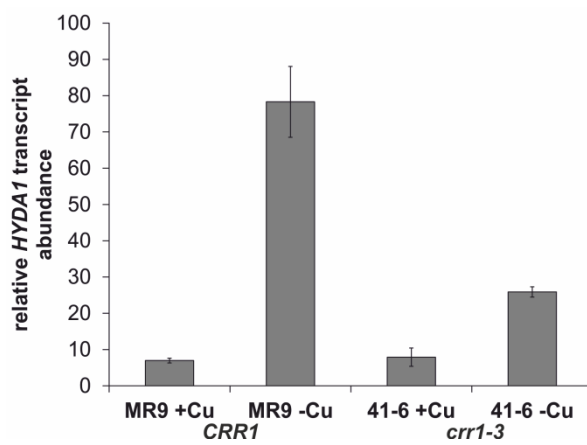

**Supplemental figure S3.** Analysis of relative *HYDA1* transcript abundance in *C. reinhardtii* strain MR9 (*CRR1*) and *crr1-3* mutant 41-6 incubated in Cu-replete (+Cu) or Cu-deficient medium (-Cu). qPCR was done as described in details in the materials and methods section. Each depicted value represents the average from three biological experiments. Error bars indicate the standard deviation.

### Supplemental figure S4

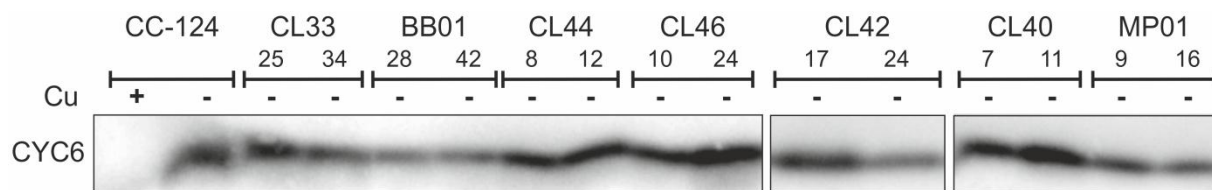

**Supplemental figure S4.** CYC6 protein levels in randomly selected copper deficient *C. reinhardtii* transformants used for *HYDA1* promoter analyses. Crude protein extracts were separated by Tris Tricin-PAGE, blotted on PVDF membranes and analyzed for CYC6 protein levels using anti-*C. reinhardtii*-CYC6-antibody, which was kindly donated by S. Merchant, UCLA, USA.
